# Supplementary material for: An ultra-high-throughput screen for the evaluation of peptide HLA-Binder interactions
Source: Sci Rep. 2023 Mar 31;13:5290. doi: 10.1038/s41598-023-32384-z (PMC10066226; doi:10.1038/s41598-023-32384-z)
Supplement: Supplementary file 1 — Supplementary Information 1. [file 41598_2023_32384_MOESM1_ESM.xlsx]

## Sheet: Data
				highSCORE							BLI
Sequence	Name	AS	Position	highSCORE_kdiss	highSCORE_std_kdiss	highSCORE_kass	highSCORE_std_kass	highSCORE_KD	highSCORE_std_KD	highSCORE_n	BLI_kdiss	BLI_std_kdiss	BLI_kass	BLI_std_kass	BLI_KD	BLI_std_KD
YLLQHLIGL	Y1	Y	1	0.00143968	1.22728e-05	114685	2203.45	1.25534e-08	2.63863e-10	151	0.0007923	4.195e-06	131400	167.2	6.0310000000000004E-9	3.284e-11
WLLQHLIGL	W1	W	1	0.00152577	1.4263e-05	121150	2543.53	1.25941e-08	2.89439e-10	144	0.0008572	7.078e-06	112700	248	7.6049999999999993E-9	6.499e-11
HLLQHLIGL	H1	H	1	0.0015093	1.41333e-05	110647	2770.47	1.36407e-08	3.6465e-10	148	0.0007491	4.828e-06	128500	188.7	5.8299999999999999E-9	3.854e-11
GLLQHLIGL	G1	G	1	0.00146599	1.34367e-05	109993	2898.36	1.3328e-08	3.71835e-10	146	0.0006914	3.798e-06	146000	167.5	4.7360000000000002E-9	2.658e-11
PLLQHLIGL	P1	P	1	0.00156479	1.78812e-05	123670	3330.36	1.26529e-08	3.70144e-10	136	0.0008131	3.937e-06	124100	149.2	6.5510000000000002E-9	3.268e-11
ALLQHLIGL	A1	A	1	0.00152699	1.36058e-05	118417	2596.12	1.28951e-08	3.05163e-10	147	0.0008233	3.749e-06	129900	147.9	6.3380000000000002E-9	2.975e-11
VLLQHLIGL	V1	V	1	0.00152127	1.46555e-05	112430	2526.88	1.35309e-08	3.30869e-10	143	0.0008723	3.886e-06	130000	153.4	6.7109999999999997E-9	3.092e-11
LLLQHLIGL	L1	L	1	0.00152986	1.38575e-05	113452	2722.92	1.34846e-08	3.45919e-10	138	0.0007599	3.273e-06	130900	130.1	5.8049999999999997E-9	2.566e-11
ILLQHLIGL	I1	I	1	0.00162871	1.33835e-05	120016	2263.14	1.35708e-08	2.79145e-10	139	0.0008797	3.631e-06	132600	145.9	6.6329999999999997E-9	2.833e-11
MLLQHLIGL	M1	M	1	0.00158812	1.41928e-05	108689	2630.77	1.46116e-08	3.77004e-10	136	0.0007908	3.337e-06	136000	137.3	5.814E-9	2.522e-11
FLLQHLIGL	F1	F	1	0.00147108	1.27481e-05	117263	2056.53	1.25451e-08	2.45406e-10	146	0.0008976	3.848e-06	141100	163.8	6.3620000000000002E-9	2.825e-11
KLLQHLIGL	K1	K	1	0.00152737	1.17564e-05	124338	3063.85	1.2284e-08	3.17116e-10	150	0.0008743	6.013e-06	120200	221.8	7.273E-9	5.179e-11
RLLQHLIGL	R1	R	1	0.00144331	1.27201e-05	130702	3269.78	1.10428e-08	2.92901e-10	149	0.0008243	4.803e-06	137100	199.1	6.0129999999999998E-9	3.611e-11
QLLQHLIGL	Q1	Q	1	0.00148346	1.39376e-05	116246	2598.72	1.27613e-08	3.09454e-10	135	0.0009436	6.67e-06	100800	215.4	9.3619999999999997E-9	6.913e-11
NLLQHLIGL	N1	N	1	0.00149484	1.48611e-05	109303	2977.9	1.36762e-08	3.96634e-10	140	0.0009616	7.469e-06	101800	242.8	9.4440000000000001E-9	7.674e-11
ELLQHLIGL	E1	E	1	0.00143935	1.51936e-05	103117	1945.6	1.39585e-08	3.01781e-10	141	0.000982	6.934e-06	94290	214.5	1.041E-8	7.726e-11
DLLQHLIGL	D1	D	1	0.00122528	3.0347e-05	108030	4560.38	1.13421e-08	5.55119e-10	106	0.0007508	1.298e-05	97750	470.9	7.6799999999999999E-9	1.379e-10
TLLQHLIGL	T1	T	1	0.00154514	1.41786e-05	114432	2245.88	1.35027e-08	2.92545e-10	147	0.001051	6.296e-06	107400	212.4	9.7900000000000003E-9	6.174e-11
SLWQHLIGL	W3	W	3	0.00138421	1.15728e-05	104772	2443.57	1.32117e-08	3.27334e-10	147	0.001374	5.55e-06	164800	274.7	8.3419999999999995E-9	3.645e-11
SLHQHLIGL	H3	H	3	0.00475137	4.4242e-06	87810.6	2431.93	5.41093e-08	1.49942e-09	153	0.01697	7.796e-05	95400	1034	1.779E-7	2.094e-09
SLKQHLIGL	K3	K	3	0.00137719	8.94932e-06	129716	2928.63	1.06169e-08	2.49431e-10	146	0.001929	6.779e-06	173800	351	1.11E-8	4.499e-11
SLGQHLIGL	G3	G	3	0.00175393	2.09045e-05	129599	3445.21	1.35335e-08	3.94272e-10	128	0.0006868	3.093e-06	160700	150.4	4.2729999999999996E-9	1.966e-11
SLPQHLIGL	P3	P	3	0.0010553	8.3136e-06	110236	1894.44	9.57311e-09	1.80979e-10	138	0.002127	6.401e-06	110100	216.4	1.932E-8	6.945e-11
SLAQHLIGL	A3	A	3	0.00157188	1.38175e-05	119825	2531.74	1.31181e-08	3.00199e-10	149	0.0007698	3.191e-06	159600	153.9	4.8220000000000001E-9	2.052e-11
SLVQHLIGL	V3	V	3	0.00128048	1.11833e-05	116793	2203.98	1.09637e-08	2.27978e-10	142	0.001233	6.249e-06	115100	222	1.071E-8	5.809e-11
SLIQHLIGL	I3	I	3	0.00108027	8.91248e-06	106953	2509.18	1.01004e-08	2.51187e-10	146	0.001643	3.56e-06	155700	165.5	1.055E-8	2.546e-11
SLMQHLIGL	M3	M	3	0.00149128	1.35521e-05	111090	2703.24	1.34242e-08	3.48698e-10	150	0.0008453	4.406e-06	124600	167.5	6.7830000000000003E-9	3.651e-11
SLFQHLIGL	F3	F	3	0.00381891	3.41054e-06	104677	2392.2	3.64826e-08	8.34375e-10	155	0.01266	2.472e-05	188800	709.1	6.7029999999999999E-8	2.838e-10
SLYQHLIGL	Y3	Y	3	0.00502123	3.99328e-06	104680	2805.54	4.79672e-08	1.28614e-09	156	0.02034	5.302e-05	136300	742.2	1.4929999999999999E-7	9.011e-10
SLRQHLIGL	R3	R	3	0.0240168	0.000105927	79052	9447.94	3.0381e-07	3.63348e-08	76	0.08818	0.0006501	111600	1479	7.9009999999999996E-7	1.198e-08
SLQQHLIGL	Q3	Q	3	0.00120087	1.19547e-05	133773	2848.72	8.97691e-09	2.11023e-10	145	0.001123	4.309e-06	144000	186.7	7.8019999999999993E-9	3.16e-11
SLNQHLIGL	N3	N	3	0.0020308	1.73823e-05	125951	2626.23	1.61237e-08	3.63423e-10	142	0.0007691	6.977e-06	110600	240.9	6.9539999999999998E-9	6.488e-11
SLEQHLIGL	E3	E	3	0.00129304	1.27424e-05	122871	2737.46	1.05235e-08	2.56366e-10	138	0.001986	9.174e-06	116000	323.9	1.7109999999999999E-8	9.237e-11
SLDQHLIGL	D3	D	3	0.00123174	1.31492e-05	108738	2152.52	1.13276e-08	2.54762e-10	140	0.001492	4.012e-06	132200	159.7	1.1290000000000001E-8	3.326e-11
SLSQHLIGL	S3	S	3	0.00215228	2.1875e-05	119926	3510.45	1.79467e-08	5.56097e-10	127	0.0008163	3.693e-06	139200	155.3	5.8639999999999996E-9	2.732e-11
SLTQHLIGL	T3	T	3	0.00176428	1.9242e-05	116547	3838.18	1.51379e-08	5.25157e-10	134	0.0008926	5.685e-06	125900	218	7.0880000000000003E-9	4.679e-11
SLLAHLIGL	A4	A	4	0.00138312	1.39062e-05	115733	2420.77	1.1951e-08	2.77356e-10	141	0.001049	4.391e-06	129600	172.5	8.0950000000000007E-9	3.556e-11
SLLVHLIGL	V4	V	4	0.00146872	1.53999e-05	118066	2808.48	1.24399e-08	3.23385e-10	131	0.0008492	4.715e-06	123100	177.5	6.8960000000000002E-9	3.956e-11
SLLLHLIGL	L4	L	4	0.00144	1.77256e-05	125671	3095.55	1.14585e-08	3.15528e-10	134	0.0008718	5.046e-06	123300	190.1	7.0710000000000001E-9	4.236e-11
SLLGHLIGL	G4	G	4	0.00134237	1.41031e-05	98010.1	3160.51	1.36962e-08	4.64508e-10	138	0.0012	3.937e-06	133000	158.1	9.0259999999999992E-9	3.149e-11
SLLPHLIGL	P4	P	4	0.00139153	1.44248e-05	113197	2599.49	1.2293e-08	3.09729e-10	140	0.0008138	3.682e-06	131900	147.3	6.1689999999999997E-9	2.875e-11
SLLIHLIGL	I4	I	4	0.00160117	1.765e-05	125185	2913.62	1.27905e-08	3.29393e-10	129	0.0008059	5.256e-06	106600	176.7	7.5599999999999995E-9	5.087e-11
SLLEHLIGL	E4	E	4	0.00110725	1.22464e-05	74939.1	1409.1	1.47753e-08	3.22322e-10	132	0.001498	5.391e-06	85540	157	1.7520000000000001E-8	7.075e-11
SLLDHLIGL	D4	D	4	0.000979018	7.78448e-06	64287.9	1040.87	1.52287e-08	2.74693e-10	143	0.002767	8.584e-06	73570	226.5	3.7609999999999997E-8	1.644e-10
SLLSHLIGL	S4	S	4	0.00140646	1.29875e-05	111499	3081.1	1.2614e-08	3.67515e-10	139	0.0009874	4.6e-06	121800	171.5	8.1039999999999993E-9	3.944e-11
SLLMHLIGL	M4	M	4	0.00152446	1.69741e-05	122341	2731.97	1.24608e-08	3.10932e-10	133	0.0007652	4.456e-06	124600	169.5	6.1440000000000003E-9	3.674e-11
SLLFHLIGL	F4	F	4	0.00160588	1.67309e-05	123171	2807.26	1.30378e-08	3.26728e-10	138	0.0008501	5.969e-06	112900	209.4	7.5270000000000002E-9	5.466e-11
SLLYHLIGL	Y4	Y	4	0.00161838	1.63016e-05	114532	2849.22	1.41304e-08	3.79245e-10	138	0.0009068	5.876e-06	117900	213.2	7.6909999999999992E-9	5.174e-11
SLLWHLIGL	W4	W	4	0.00138475	1.20216e-05	105985	2064.14	1.30656e-08	2.78599e-10	140	0.001384	6.274e-06	106700	210	1.2979999999999999E-8	6.414e-11
SLLHHLIGL	H4	H	4	0.00132088	1.33907e-05	107545	2536.99	1.22821e-08	3.15357e-10	142	0.00117	5.631e-06	117100	202.9	9.9879999999999998E-9	5.11e-11
SLLKHLIGL	K4	K	4	0.00164683	1.39899e-05	153530	3277.36	1.07265e-08	2.46441e-10	144	0.0009257	5.998e-06	143200	259	6.464E-9	4.348e-11
SLLRHLIGL	R4	R	4	0.001399	1.33758e-05	152145	4916.86	9.19522e-09	3.09894e-10	137	0.0009211	5.789e-06	162600	284.3	5.6640000000000003E-9	3.695e-11
SLLNHLIGL	N4	N	4	0.00137383	1.36715e-05	108826	2495.95	1.26241e-08	3.15615e-10	134	0.0009984	4.391e-06	121800	163.6	8.1949999999999999E-9	3.768e-11
SLLTHLIGL	T4	T	4	0.00145042	1.50492e-05	108486	2879.78	1.33696e-08	3.81045e-10	139	0.0009	5.43e-06	106300	182.1	8.465E-9	5.309e-11
SLLQYLIGL	Y5	Y	5	0.0129364	1.57328e-05	50856.6	2299.25	2.5437e-07	1.15044e-08	130	0.05049	0.0003124	77360	1475	6.5280000000000002E-7	1.308e-08
SLLQWLIGL	W5	W	5	0.0139253	0.000242584	46993	3802.85	2.96326e-07	2.45291e-08	21	0.2058	0.00186	91480	3263	2.249E-6	8.277e-08
SLLQKLIGL	K5	K	5	0.0205195	3.69978e-05	67935.3	4475.12	3.02045e-07	1.99042e-08	101	0.08965	0.0008942	109300	3005	8.1999999999999998E-7	2.398e-08
SLLQGLIGL	G5	G	5	0.027714	8.33675e-05	60725.9	9821.74	4.56378e-07	7.38268e-08	61	0.09828	0.00132	136000	4448	7.2269999999999998E-7	2.555e-08
SLLQPLIGL	P5	P	5	0.0169516	2.50829e-05	50354	2986.57	3.36648e-07	1.99733e-08	106	0.05717	0.0003802	91350	1712	6.2580000000000001E-7	1.244e-08
SLLQALIGL	A5	A	5	0.0111123	1.01684e-05	121315	2633.31	9.15991e-08	1.99006e-09	151	0.03348	0.0001165	140100	1027	2.389E-7	1.938e-09
SLLQVLIGL	V5	V	5							0	0.1587	0.001843	92940	3509	1.708E-6	6.746e-08
SLLQLLIGL	L5	L	5	0.0271855	0.000111827	36187.5	9254.1	7.5124e-07	1.92137e-07	46	0.1678	0.001325	84490	2455	1.9860000000000001E-6	5.981e-08
SLLQILIGL	I5	I	5							2	0.2302	0.003298	60530	5393	3.8029999999999998E-6	3.432e-07
SLLQMLIGL	M5	M	5	0.02695	0.000130266	38988.7	10918	6.91228e-07	1.93593e-07	44	0.1692	0.001349	124100	2638	1.3629999999999999E-6	3.094e-08
SLLQFLIGL	F5	F	5	0.0262963	4.54698e-05	84528	6405.53	3.11096e-07	2.3581e-08	98	0.1038	0.000845	101200	2498	1.026E-6	2.667e-08
SLLQRLIGL	R5	R	5	0.0149444	0.000571917	14744.8	8171.76	1.01354e-06	5.63052e-07	7	0.1718	0.003276	40020	6430	4.2919999999999997E-6	6.944e-07
SLLQQLIGL	Q5	Q	5	0.0194489	2.41004e-05	103813	4331.27	1.87346e-07	7.81986e-09	129	0.04528	0.0002308	123600	1434	3.6650000000000001E-7	4.647e-09
SLLQNLIGL	N5	N	5	0.0218324	2.75093e-05	99832.9	5260.7	2.1869e-07	1.15272e-08	125	0.06279	0.0004092	139100	2016	4.5130000000000002E-7	7.168e-09
SLLQELIGL	E5	E	5							2	0.2041	0.001952	59540	3318	3.4290000000000001E-6	1.939e-07
SLLQDLIGL	D5	D	5	0.010002	1.2122e-05	90027.9	1858.4	1.11099e-07	2.29731e-09	123	0.03261	0.0001039	120100	858.6	2.7150000000000002E-7	2.125e-09
SLLQSLIGL	S5	S	5	0.0176299	1.97361e-05	115568	4386.47	1.52549e-07	5.79261e-09	134	0.06688	0.0003296	196100	1055	3.411E-7	2.489e-09
SLLQTLIGL	T5	T	5							11	0.2287	0.003078	65970	5109	3.4659999999999999E-6	2.724e-07
SLLQHAIGL	A6	A	6	0.00150744	4.37826e-06	110550	2396.98	1.36359e-08	2.983e-10	148	0.004752	5.675e-06	154200	231.5	3.0810000000000003E-8	5.909e-11
SLLQHVIGL	V6	V	6	0.0010198	6.46528e-06	103001	2725.47	9.90085e-09	2.69397e-10	146	0.00215	2.941e-06	156900	136	1.37E-8	2.22e-11
SLLQHIIGL	I6	I	6	0.00119238	1.16776e-05	109409	1643.61	1.08984e-08	1.9544e-10	144	0.0009213	2.489e-06	136400	102.6	6.7530000000000002E-9	1.894e-11
SLLQHGIGL	G6	G	6	0.00118951	5.15265e-06	118893	2605.52	1.00049e-08	2.23497e-10	153	0.004037	4.906e-06	165700	229.8	2.435E-8	4.49e-11
SLLQHPIGL	P6	P	6							1					no fit
SLLQHMIGL	M6	M	6	0.00115189	9.39315e-06	102764	2571	1.12091e-08	2.94956e-10	148	0.001225	4.155e-06	133100	167	9.2039999999999992E-9	3.328e-11
SLLQHEIGL	E6	E	6	0.00839942	1.1192e-05	61191.9	1639.42	1.37264e-07	3.68203e-09	139	0.0301	0.0001031	107400	863.7	2.804E-7	2.451e-09
SLLQHDIGL	D6	D	6	0.00661513	8.08489e-06	54272.1	1313.84	1.21888e-07	2.95449e-09	147	0.02773	9.464e-05	98430	817.8	2.8169999999999999E-7	2.53e-09
SLLQHSIGL	S6	S	6	0.00183115	3.59357e-06	111274	2349.77	1.64562e-08	3.49004e-10	155	0.005723	6.748e-06	176400	296.8	3.2450000000000003E-8	6.667e-11
SLLQHFIGL	F6	F	6	0.00102272	7.25797e-06	101907	2355.63	1.00358e-08	2.42669e-10	153	0.001958	4.732e-06	131000	185.1	1.4950000000000002E-8	4.186e-11
SLLQHYIGL	Y6	Y	6	0.00117448	9.33567e-06	112648	2376.97	1.04261e-08	2.35091e-10	143	0.001666	3.186e-06	148900	141.5	1.119E-8	2.389e-11
SLLQHWIGL	W6	W	6	0.00121021	5.22581e-06	114183	1628.31	1.05989e-08	1.57924e-10	143	0.003381	3.288e-06	142600	133	2.3709999999999999E-8	3.194e-11
SLLQHHIGL	H6	H	6	0.00104206	7.61652e-06	95341.1	2057.67	1.09298e-08	2.4905e-10	148	0.00238	3.818e-06	145000	162.4	1.6409999999999999E-8	3.211e-11
SLLQHKIGL	K6	K	6	0.0232485	5.02203e-05	73214	5121.01	3.17541e-07	2.22213e-08	92	0.09242	0.002658	275100	9381	3.3589999999999998E-7	1.499e-08
SLLQHRIGL	R6	R	6	0.00128024	4.57824e-06	112341	2568.02	1.1396e-08	2.6367e-10	154	0.004342	4.022e-06	166800	186.7	2.6020000000000001E-8	3.78e-11
SLLQHQIGL	Q6	Q	6	0.00104423	6.98194e-06	110509	2018.73	9.44934e-09	1.83816e-10	151	0.002342	2.776e-06	162600	136.7	1.441E-8	2.094e-11
SLLQHNIGL	N6	N	6	0.0010912	5.15836e-06	97163.7	2071.72	1.12306e-08	2.45272e-10	154	0.00375	3.433e-06	155900	148.8	2.4059999999999998E-8	3.181e-11
SLLQHTIGL	T6	T	6	0.00172312	3.11699e-06	105403	1938.41	1.63479e-08	3.02097e-10	156	0.004493	6.722e-06	132800	242.2	3.3839999999999997E-8	7.985e-11
SLLQHLWGL	W7	W	7							1					no fit
SLLQHLHGL	H7	H	7	0.00307246	5.30177e-06	42605.7	827.813	7.21137e-08	1.40666e-09	114	0.01436	1.861e-05	66470	242.9	2.16E-7	8.375e-10
SLLQHLKGL	K7	K	7	0.00601576	5.86637e-06	65915.9	1407.3	9.12641e-08	1.95051e-09	152	0.02619	6.051e-05	85200	515.4	3.0740000000000001E-7	1.991e-09
SLLQHLGGL	G7	G	7	0.0279642	8.78936e-05	57432.6	11969.6	4.86904e-07	1.01488e-07	56	0.1117	0.0008887	106000	1887	1.0529999999999999E-6	2.054e-08
SLLQHLPGL	P7	P	7	0.0273597	8.13791e-05	67758.8	9769.35	4.03781e-07	5.82289e-08	62	0.0975	0.001122	101900	3475	9.568000000000001E-7	3.444e-08
SLLQHLAGL	A7	A	7	0.00509075	3.73166e-06	99601.5	3008.74	5.11112e-08	1.54441e-09	156	0.01593	2.294e-05	150200	436.4	1.061E-7	3.44e-10
SLLQHLVGL	V7	V	7	0.00105367	4.94389e-06	95801.2	1766.51	1.09985e-08	2.09267e-10	154	0.003171	3.663e-06	142400	149.1	2.227E-8	3.472e-11
SLLQHLLGL	L7	L	7	0.00114698	4.30991e-06	112134	3140.3	1.02286e-08	2.89017e-10	153	0.004049	4.923e-06	168000	226.8	2.4100000000000001E-8	4.379e-11
SLLQHLMGL	M7	M	7	0.00136291	5.2837e-06	116128	3009.43	1.17363e-08	3.07529e-10	154	0.002675	3.135e-06	181500	172.4	1.474E-8	2.223e-11
SLLQHLFGL	F7	F	7	0.00603243	4.51377e-06	114452	2848.64	5.2707e-08	1.31244e-09	155	0.0265	6.798e-05	168300	869.1	1.5739999999999999E-7	9.078e-10
SLLQHLYGL	Y7	Y	7	0.0207106	2.79495e-05	70416.8	3787.5	2.94114e-07	1.58244e-08	111	0.09594	0.0008912	117700	2912	8.1539999999999996E-7	2.155e-08
SLLQHLRGL	R7	R	7							0	0.2009	0.003194	8616	5655	2.332E-5	1.531e-05
SLLQHLQGL	Q7	Q	7	0.0265879	5.24866e-05	71307.9	5411.14	3.72861e-07	2.83038e-08	80	0.1103	0.0008996	96490	1877	1.1429999999999999E-6	2.412e-08
SLLQHLNGL	N7	N	7	0.0281681	0.000116227	54840.9	13390	5.13634e-07	1.25428e-07	30	0.1538	0.001189	53660	2163	2.8660000000000002E-6	1.176e-07
SLLQHLEGL	E7	E	7							0					no fit
SLLQHLDGL	D7	D	7							0					no fit
SLLQHLSGL	S7	S	7	0.0136473	1.52581e-05	89890.8	2834.07	1.51821e-07	4.78961e-09	142	0.04517	0.0002784	129500	1775	3.4890000000000001E-7	5.245e-09
SLLQHLTGL	T7	T	7	0.00398079	4.04286e-06	69786.1	1682.98	5.70428e-08	1.37688e-09	152	0.01629	2.486e-05	118500	394.1	1.3750000000000001E-7	5.03e-10
SLLQHLIVL	V8	V	8	0.00247111	3.15395e-06	71624.4	1239.7	3.4501e-08	5.98779e-10	151	0.009949	1.119e-05	92860	223.3	1.071E-7	2.844e-10
SLLQHLILL	L8	L	8	0.00367788	3.54994e-06	61405.5	1150.05	5.98949e-08	1.12325e-09	147	0.0162	1.842e-05	92800	250.9	1.7450000000000001E-7	5.12e-10
SLLQHLIIL	I8	I	8	0.00199932	3.40741e-06	72332.3	1105.49	2.76408e-08	4.25064e-10	154	0.007636	8.023e-06	108900	205.9	7.0130000000000007E-8	1.517e-10
SLLQHLIPL	P8	P	8	0.00147381	3.17378e-06	91781	1793.51	1.60579e-08	3.15689e-10	156	0.005723	7.062e-06	154600	279.7	3.7020000000000003E-8	8.107e-11
SLLQHLIAL	A8	A	8	0.000986107	7.05681e-06	88648.2	2220.07	1.11238e-08	2.89731e-10	147	0.00197	3.301e-06	141200	138.3	1.3949999999999999E-8	2.708e-11
SLLQHLIML	M8	M	8	0.00466253	6.65181e-06	62709.7	1008.11	7.43511e-08	1.19996e-09	144	0.01071	1.682e-05	78430	293.4	1.3650000000000001E-7	5.54e-10
SLLQHLIEL	E8	E	8	0.00944777	9.36925e-06	62090.8	1265.19	1.5216e-07	3.10416e-09	140	0.02896	9.782e-05	108900	855.2	2.6590000000000002E-7	2.274e-09
SLLQHLIDL	D8	D	8	0.00535758	4.95682e-06	74312.8	1461.09	7.20951e-08	1.41905e-09	149	0.01628	3.088e-05	122700	495.4	1.3269999999999999E-7	5.921e-10
SLLQHLISL	S8	S	8	0.00118781	8.22813e-06	106432	2057.9	1.11603e-08	2.2922e-10	148	0.00142	4.16e-06	156500	195.1	9.0710000000000006E-9	2.888e-11
SLLQHLIFL	F8	F	8							3					no fit
SLLQHLIYL	Y8	Y	8	0.0265219	8.98052e-05	46345.2	10110	5.72269e-07	1.24853e-07	43	0.1018	0.001236	72140	3458	1.4109999999999999E-6	6.978e-08
SLLQHLIWL	W8	W	8							0					no fit
SLLQHLIHL	H8	H	8	0.0107911	1.26036e-05	57816.3	1577.6	1.86644e-07	5.09751e-09	136	0.03445	0.0001231	101700	889.2	3.3879999999999999E-7	3.201e-09
SLLQHLIKL	K8	K	8	0.00829911	8.48825e-06	57432.1	1787.85	1.44503e-07	4.50078e-09	142	0.0393	0.0001497	104700	975.3	3.7539999999999999E-7	3.779e-09
SLLQHLIRL	R8	R	8	0.00104446	5.11864e-06	88660.4	1516.28	1.17805e-08	2.0958e-10	149	0.003131	3.943e-06	122600	143.6	2.555E-8	4.395e-11
SLLQHLIQL	Q8	Q	8	0.00228989	3.31416e-06	69756.4	1162.85	3.2827e-08	5.49289e-10	152	0.01073	1.184e-05	116100	261.7	9.2410000000000005E-8	2.32e-10
SLLQHLINL	N8	N	8	0.00567338	4.67282e-06	64296.4	1759.79	8.82379e-08	2.41616e-09	152	0.02419	4.903e-05	124300	547.3	1.945E-7	9.427e-10
SLLQHLITL	T8	T	8	0.00119948	9.26219e-06	113056	2093.35	1.06096e-08	2.12848e-10	140	0.001124	4.502e-06	126200	172.7	8.9030000000000004E-9	3.769e-11
SLLQHLIGL	WT	-	-	0.00146812	1.3813e-05	115537	2471.32	1.27069e-08	2.9693e-10	142	0.000767	4.004e-06	152400	189.7	5.0339999999999998E-9	2.702e-11

## Sheet: Glosary
Term	Definition	Unit
kass	Association rate constant	1/(s*M)
std_kass	Standard deviation for the association rate constant	1/(s*M)
kdiss	Dissociation rate constant	1/s
std_kdiss	Standard deviation for the dissociation rate constant	1/s
KD	Dissociation constant	M
std_KD	Standard deviation for the dissociation constant	M
n	Number of binding curves used for the analysis	-
AS	Amino Acid	-
